# Supplementary material for: Evaluation of Pupillometry for CYP2D6 Phenotyping in Children Treated with Tramadol
Source: MDPI journal article supplement (doi:10.3390/ph16091227), 2023-08-30
Supplement: s1 [file s1]

## Supplementary material

**Table S1: Assignment of predicted Cytochrome P450 (CYP)2D6 phenotypes based on dextrophan to dextromethorphan metabolite ratio (DOR/DEM MR) cut-off values, [35].**

| <b>Poor metabolizer (PM)</b><br>(Mean MR $\pm$ SD) | <b>Intermediate metabolizer</b><br><b>IM</b><br>(Mean MR $\pm$ SD) | <b>Normal metabolizer</b><br><b>NM</b><br>(Mean MR $\pm$ SD) | <b>Ultrarapid metabolizer</b><br><b>UM</b><br>(Mean MR $\pm$ SD) |
|----------------------------------------------------|--------------------------------------------------------------------|--------------------------------------------------------------|------------------------------------------------------------------|
| 0.05 $\pm$ 0.02                                    | 0.46 $\pm$ 0.41                                                    | 2.41 $\pm$ 1.79                                              | NA                                                               |

SD, standard deviation
